# Supplementary material
Source: Copernicus journal article supplement (doi:10.5194/egusphere-2023-2628)
Supplement: Supplementary file [file egusphere-2023-2628-RC1-supplement.zip]

## Crustal Softening at Propagating Rift Tips, East Africa

F. Kolawole<sup>1,2</sup>, R. Ajala<sup>1</sup>

<sup>1</sup>Lamont-Doherty Earth Observatory of Columbia University, Palisades, New York, 10964, United States

<sup>2</sup>Department of Earth and Environmental Sciences, Columbia University, New York, 10027, United States

### Contents of this file

Figures S1 to S18

### Introduction

This supplementary document contains supplemental figures (Figures S1 – S18) supporting the results and conclusions in the main manuscript.

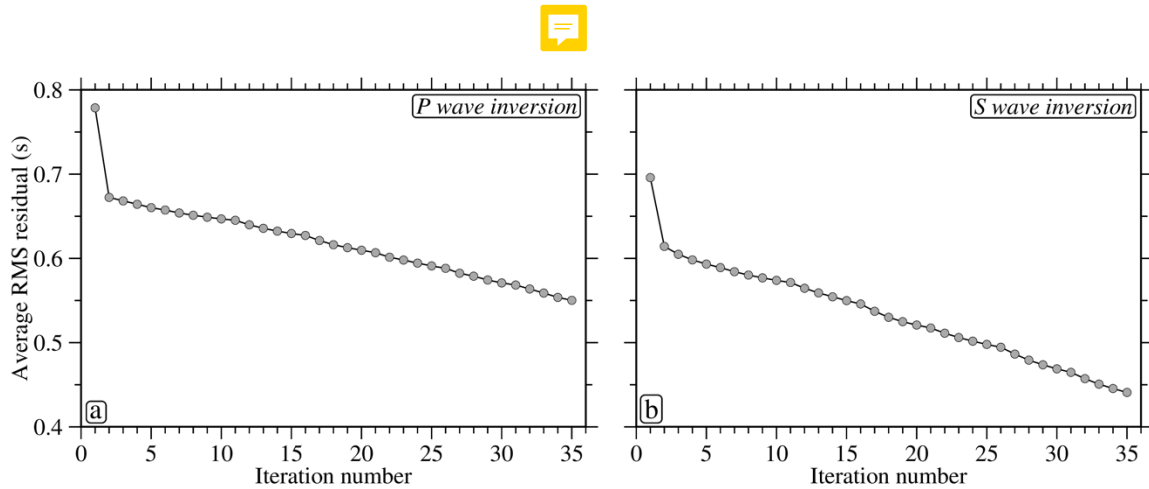

**Figure S1.** Average RMS travel time residuals for the (a) P and (b) S inversion.

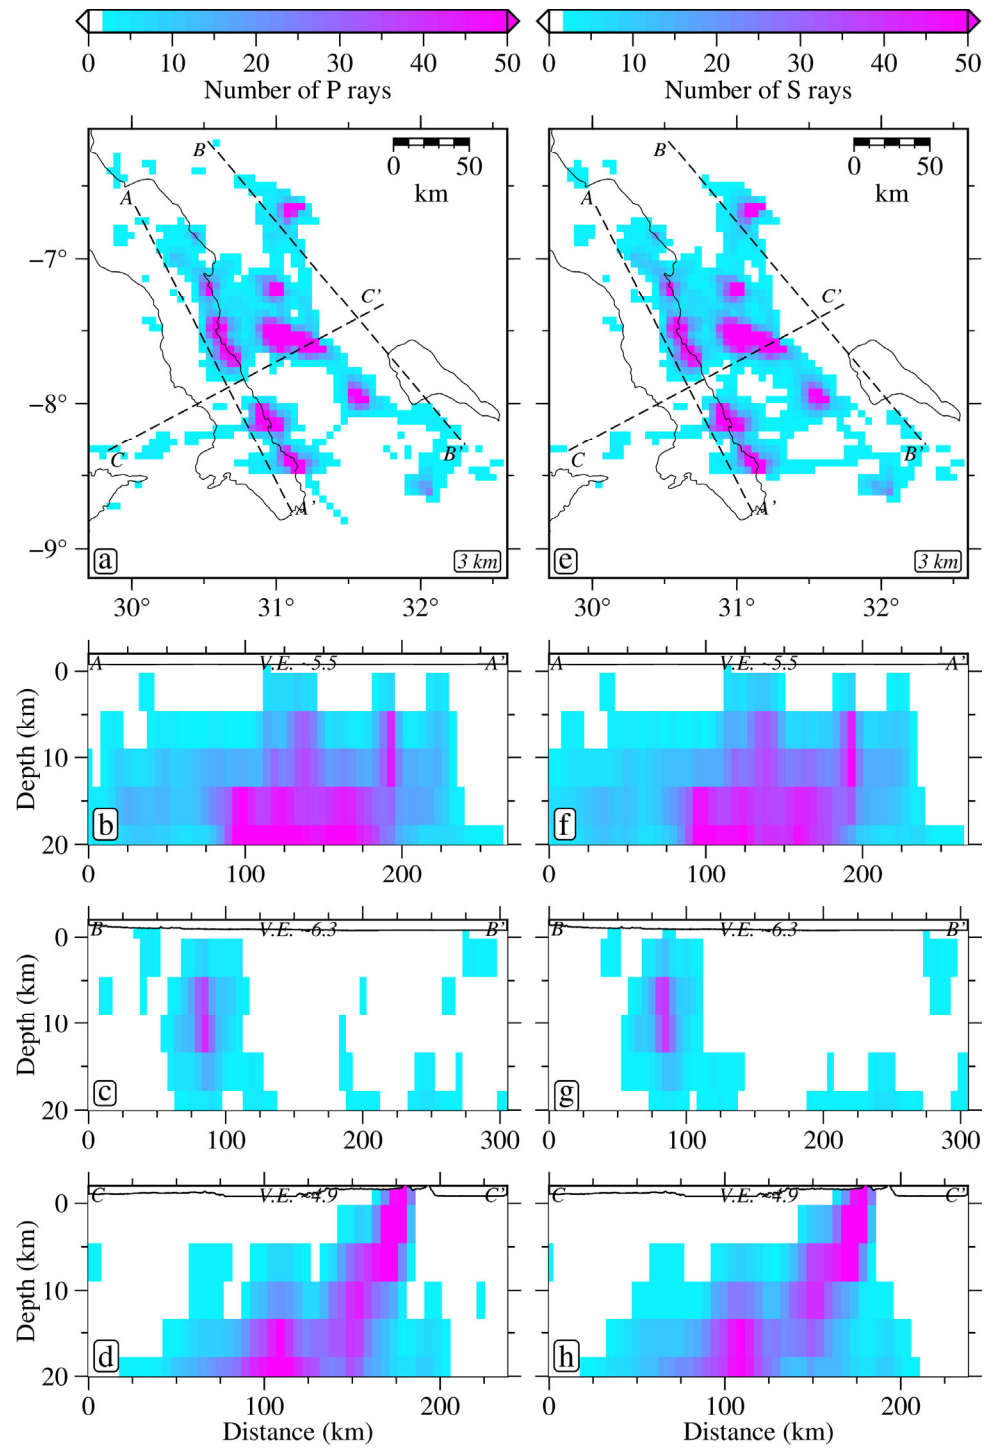

**Figure S2.** Ray coverage maps for the inversion. (a – d). Maps and profiles for the P wave model. (e – h) Maps and profiles for the S wave model.

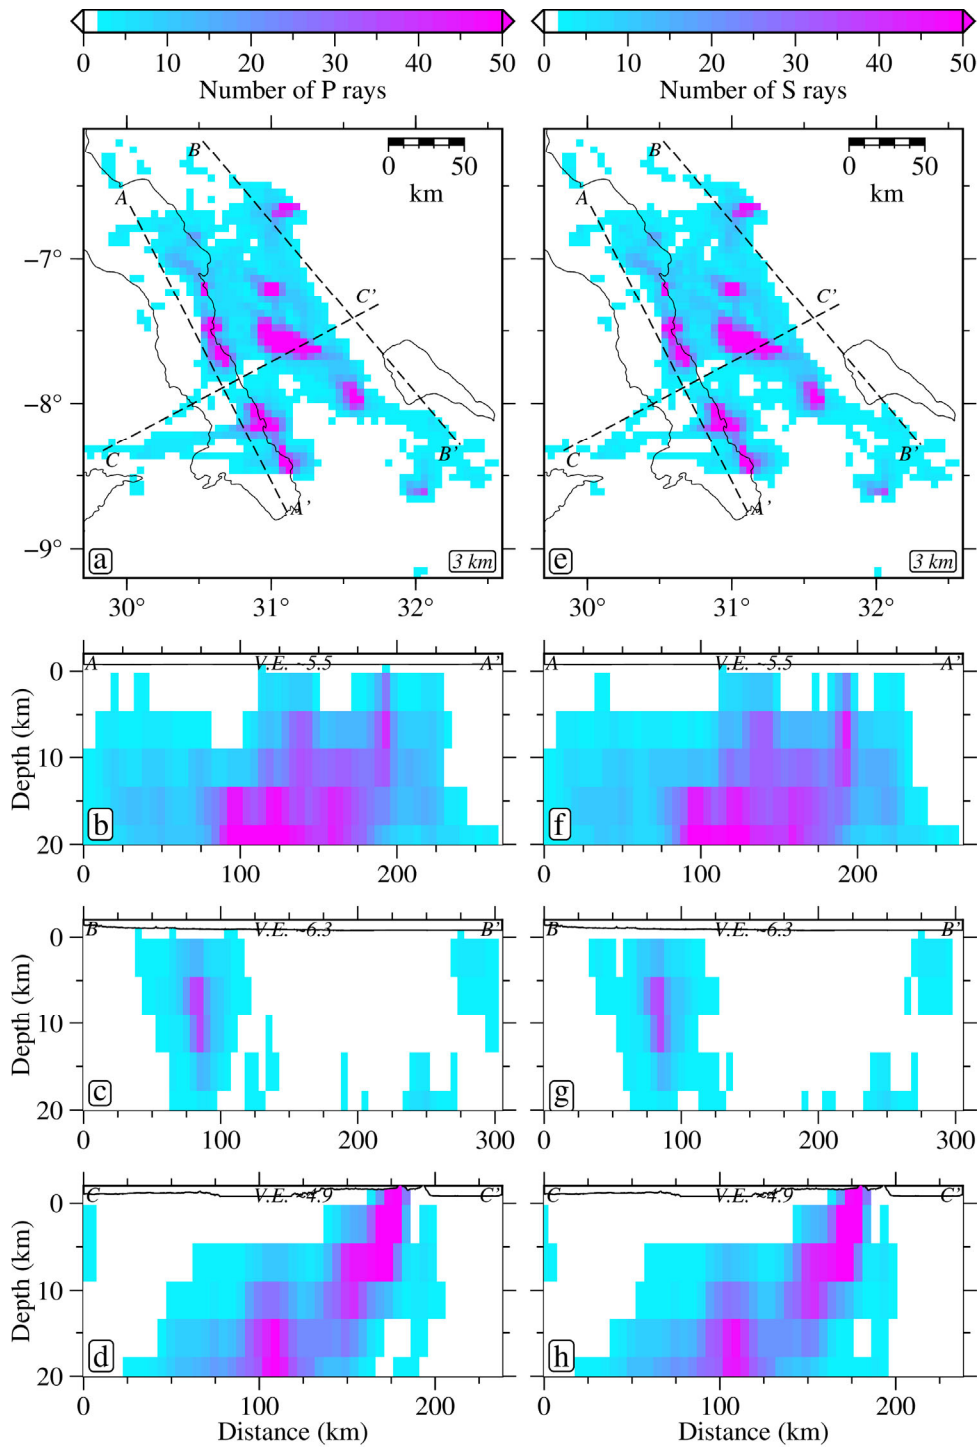

**Figure S3.** Same as Fig. S2 but for the synthetic model inversion.

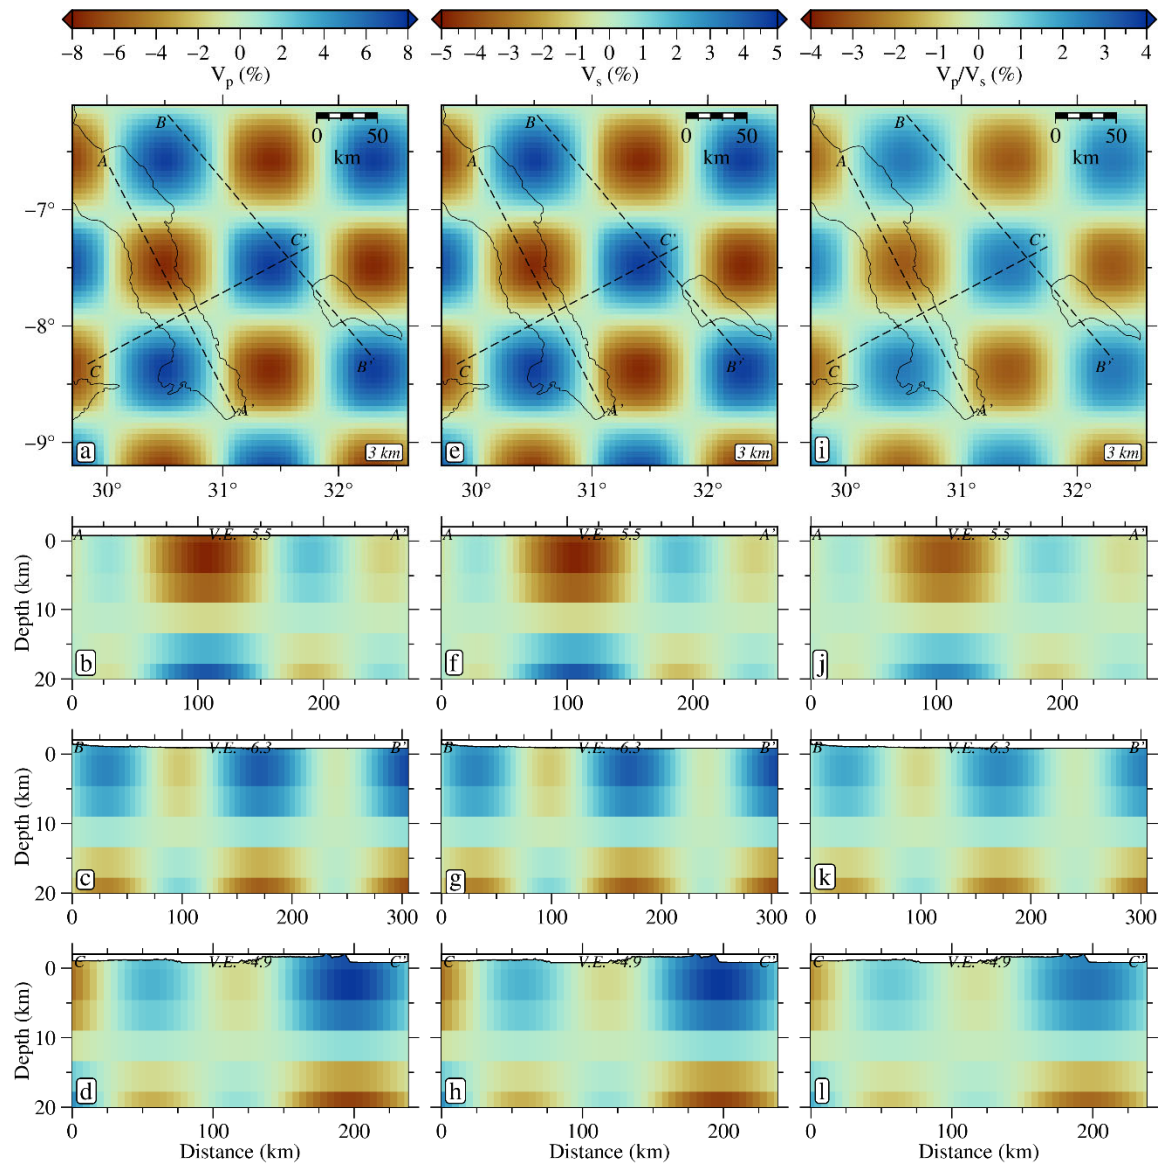

**Figure S4.** True synthetic model with 100 km x 100 km x 25 km checkers.

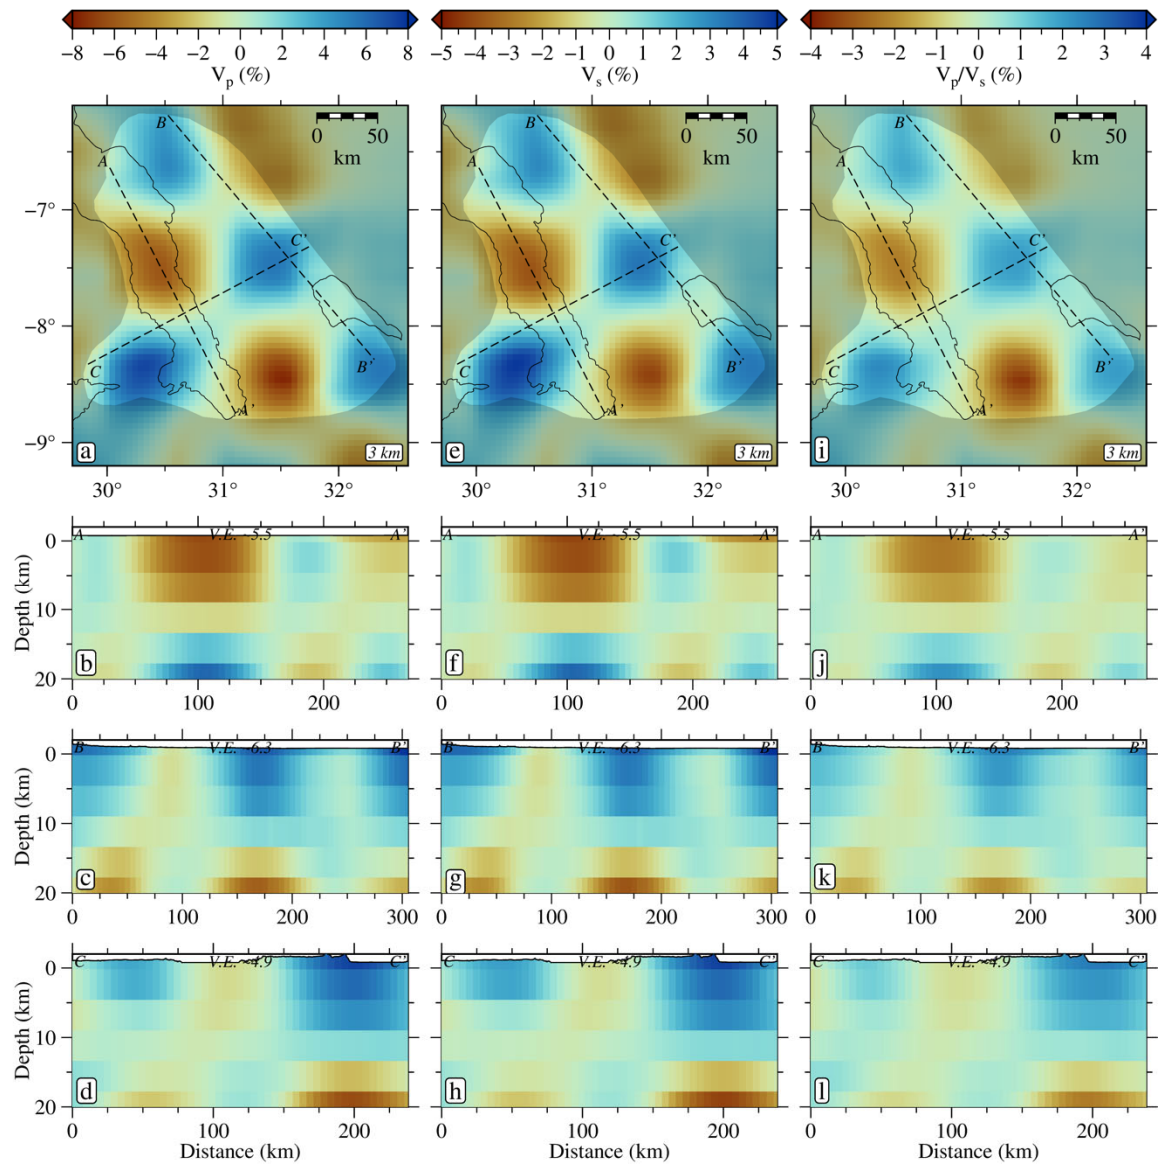

**Figure S5.** Recovered synthetic model with 100 km x 100 km x 25 km checkers. Unreliable areas of the models are lightly grayed out on the maps.

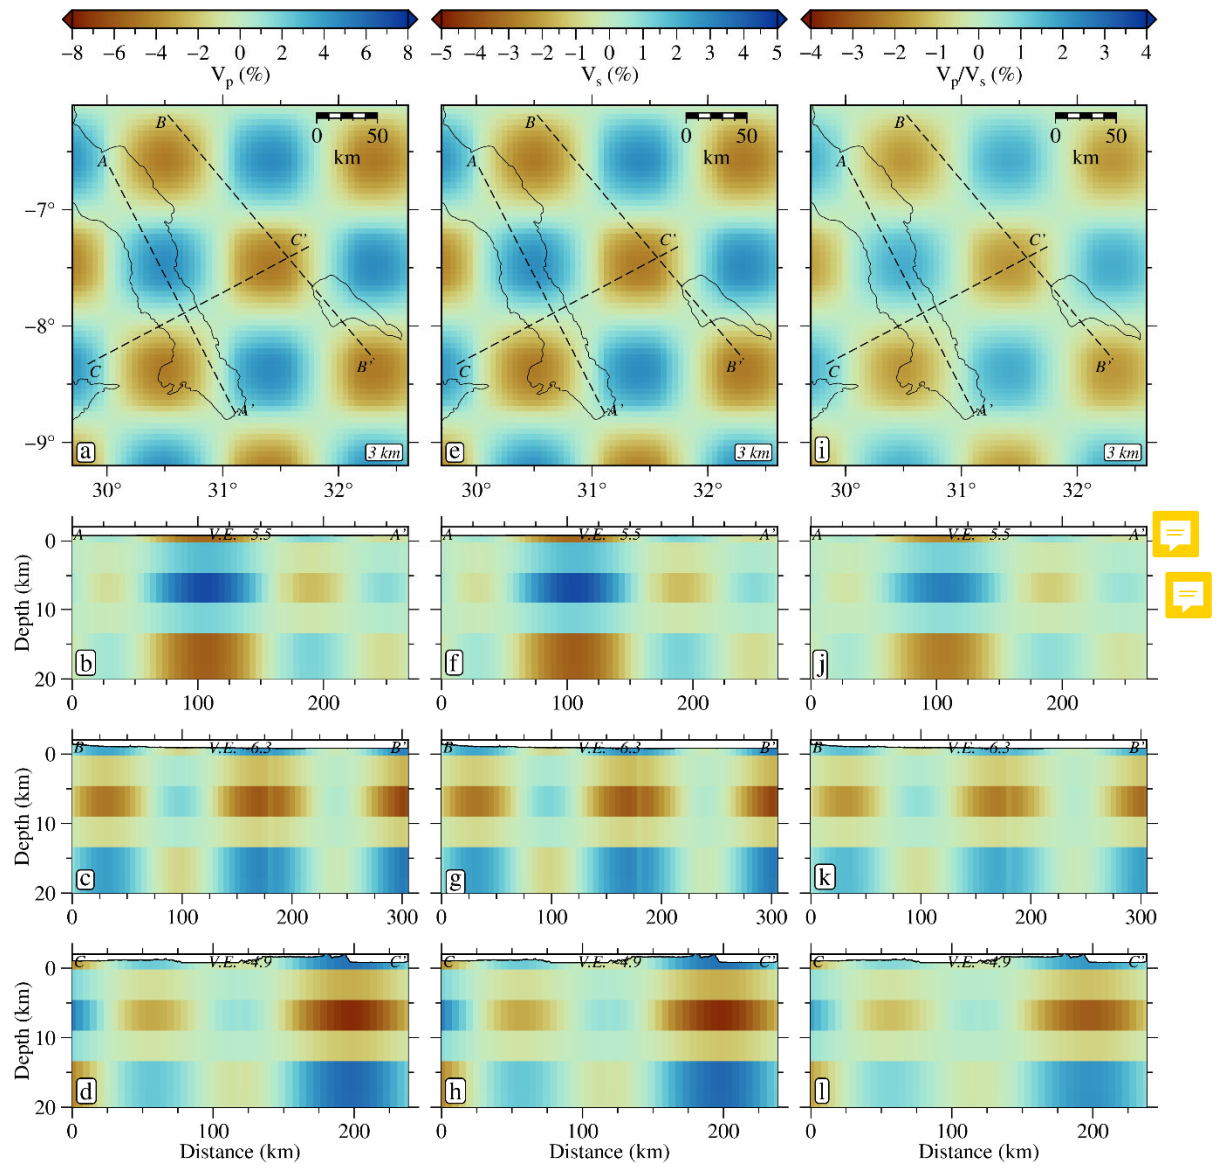

**Figure S6.** True synthetic model with 100 km x 100 km x 12.5 km checkers.

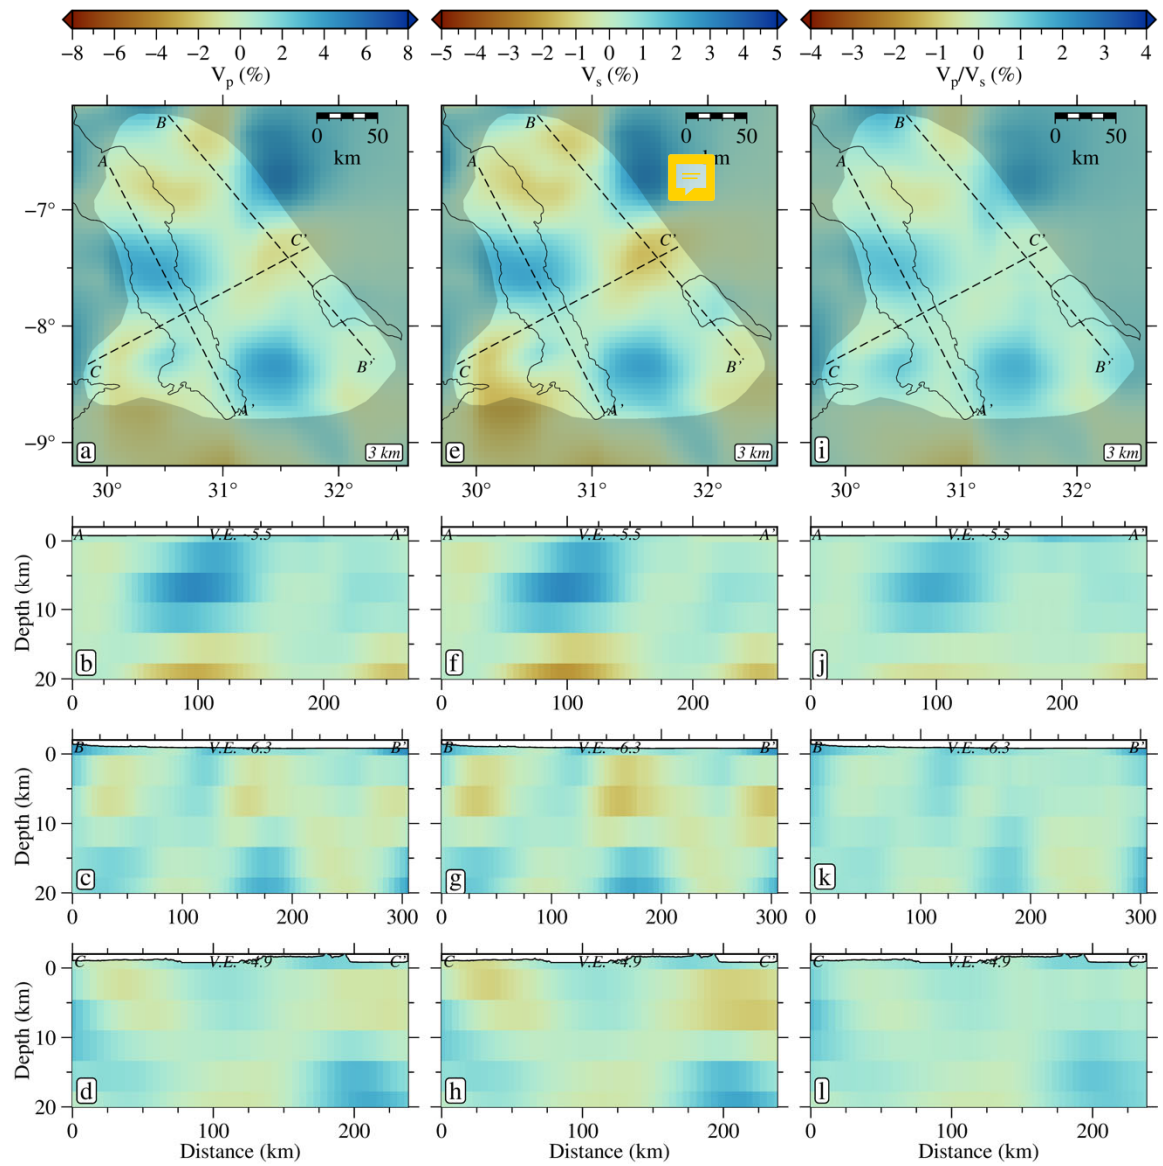

**Figure S7.** Recovered synthetic model with 100 km x 100 km x 12.5 km checkers. Unreliable areas of the models are lightly grayed out on the maps.



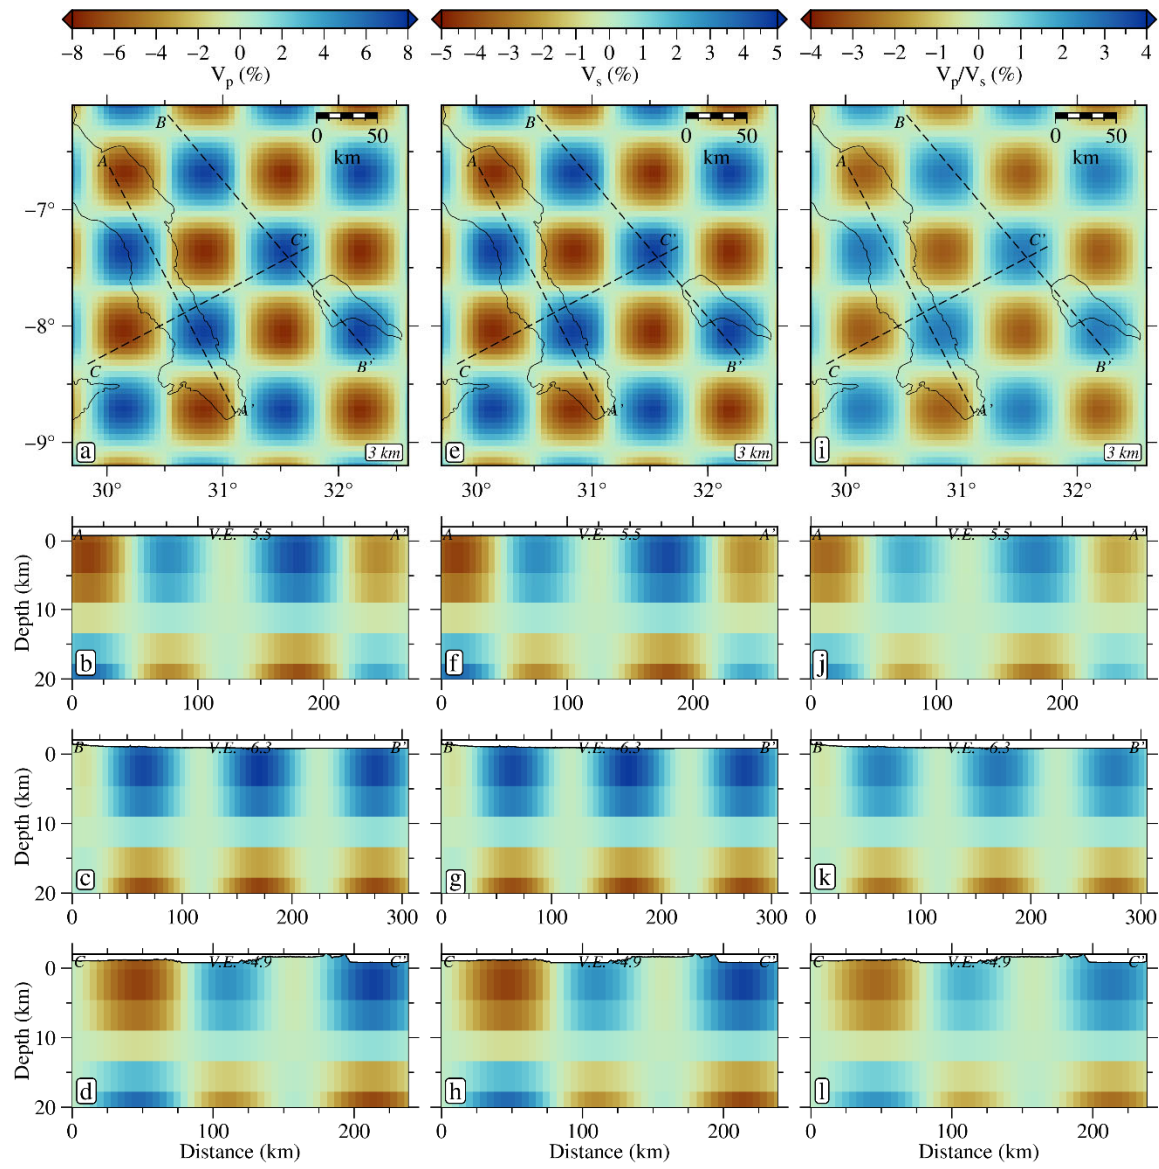

**Figure S8.** True synthetic model with 75 km x 75 km x 25 km checkers.



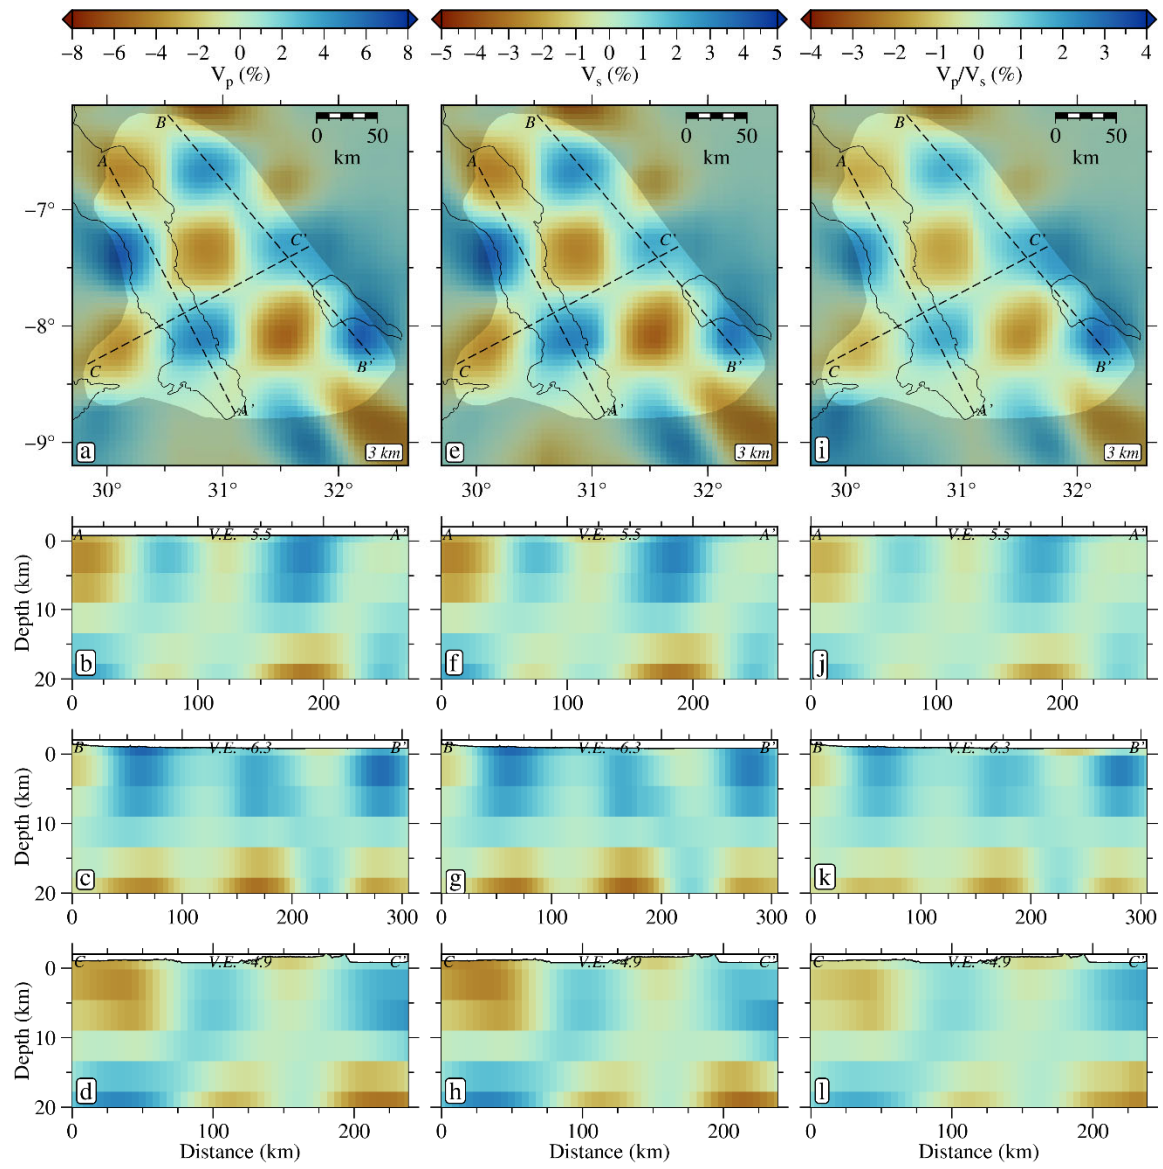

**Figure S9.** Recovered synthetic model with 75 km x 75 km x 25 km checkers. Unreliable areas of the models are lightly grayed out on the maps.

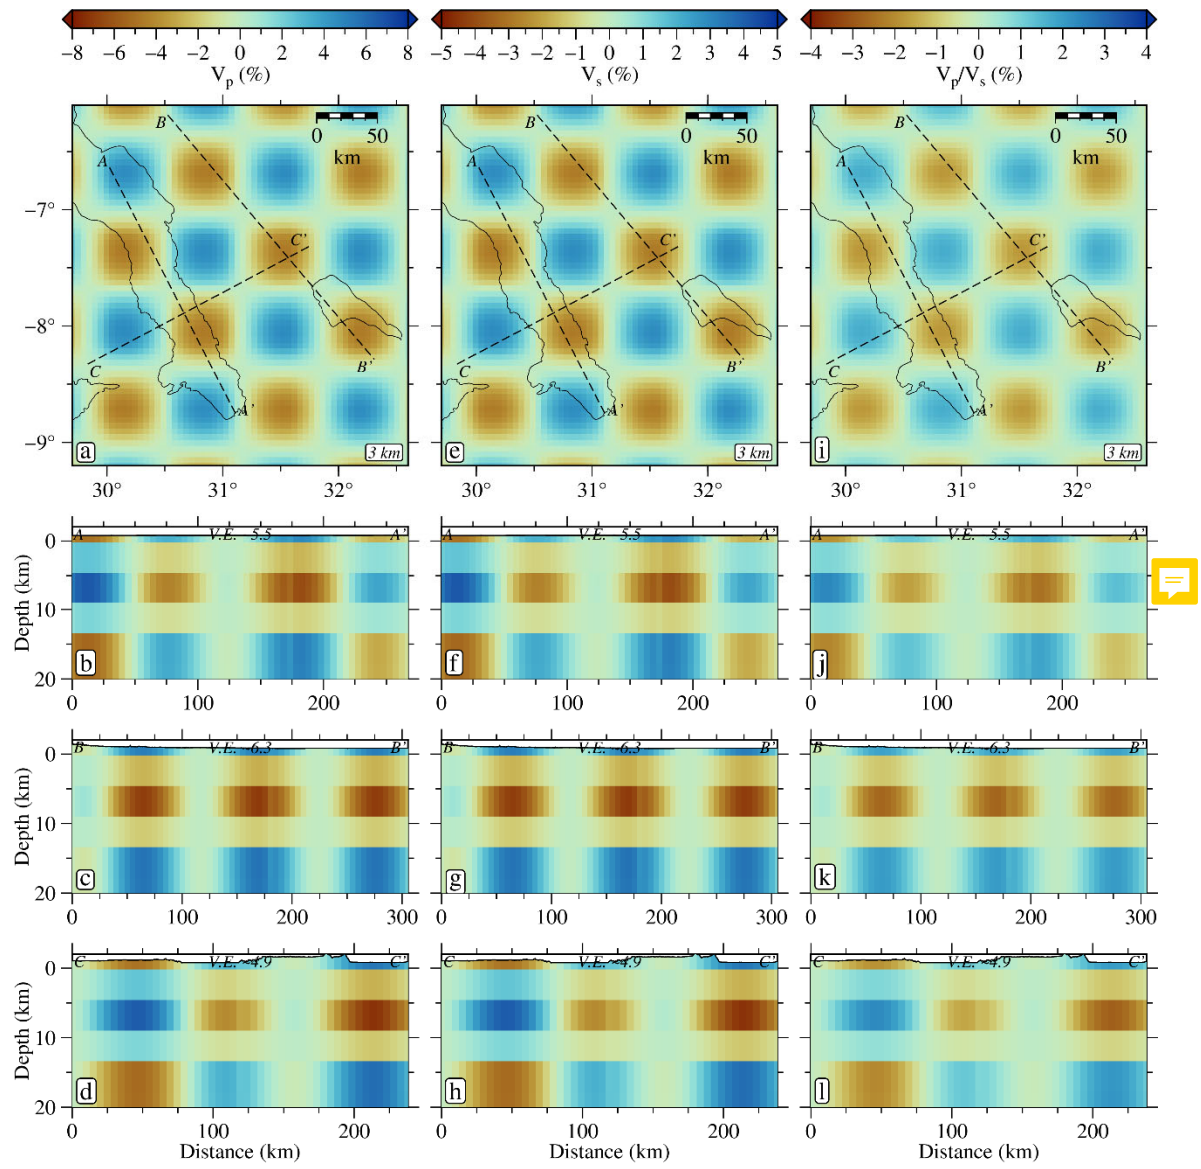

**Figure S10.** True synthetic model with 75 km x 75 km x 12.5 km checkers.

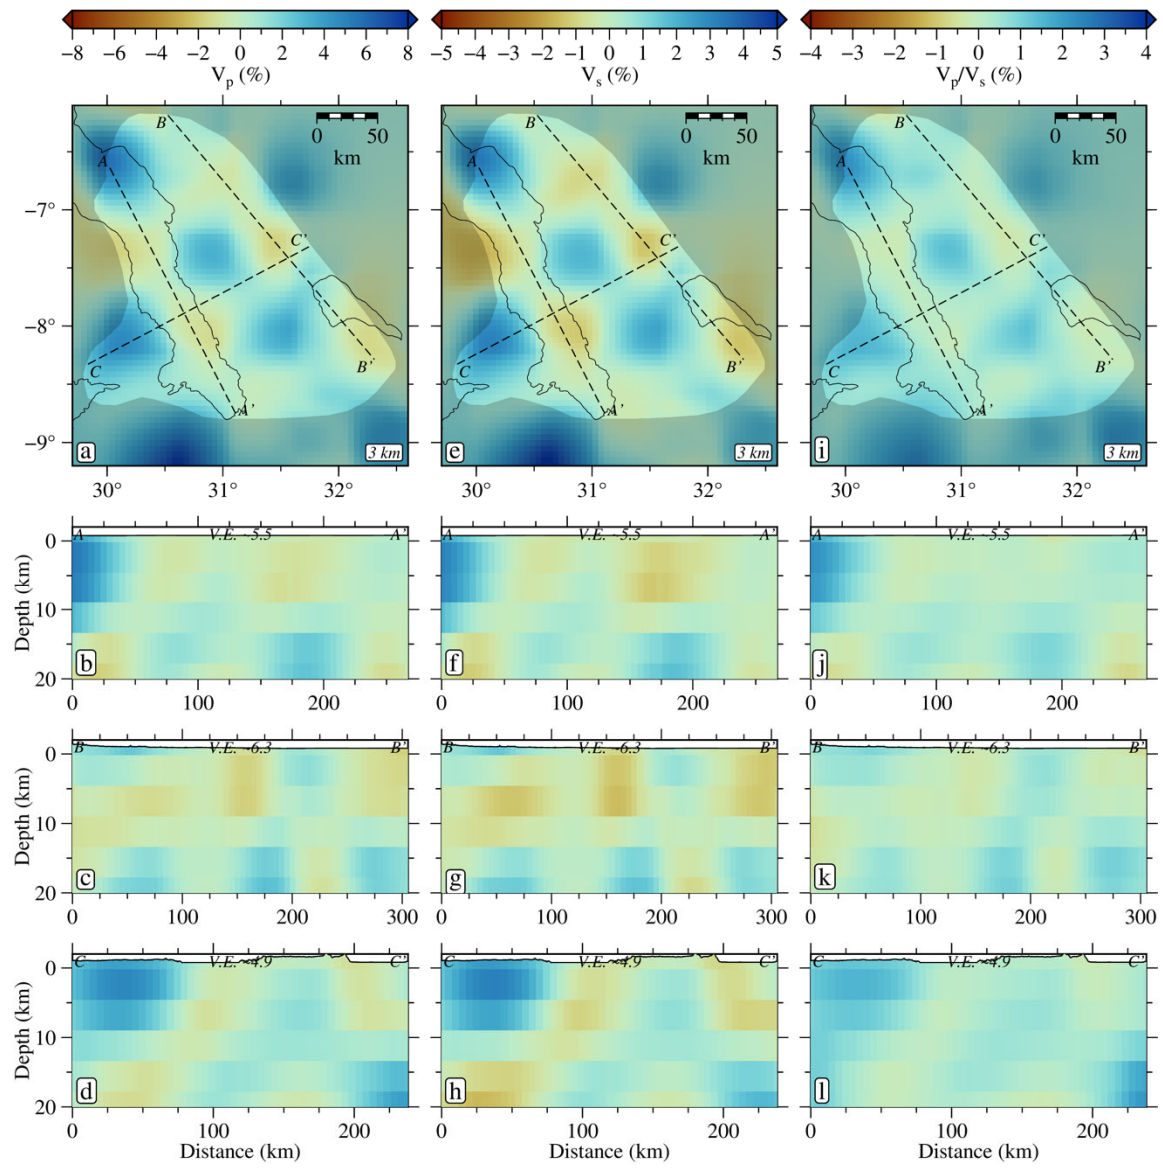

**Figure S11.** Recovered synthetic model with 75 km x 75 km x 12.5 km checkers. Unreliable areas of the models are lightly grayed out on the maps.

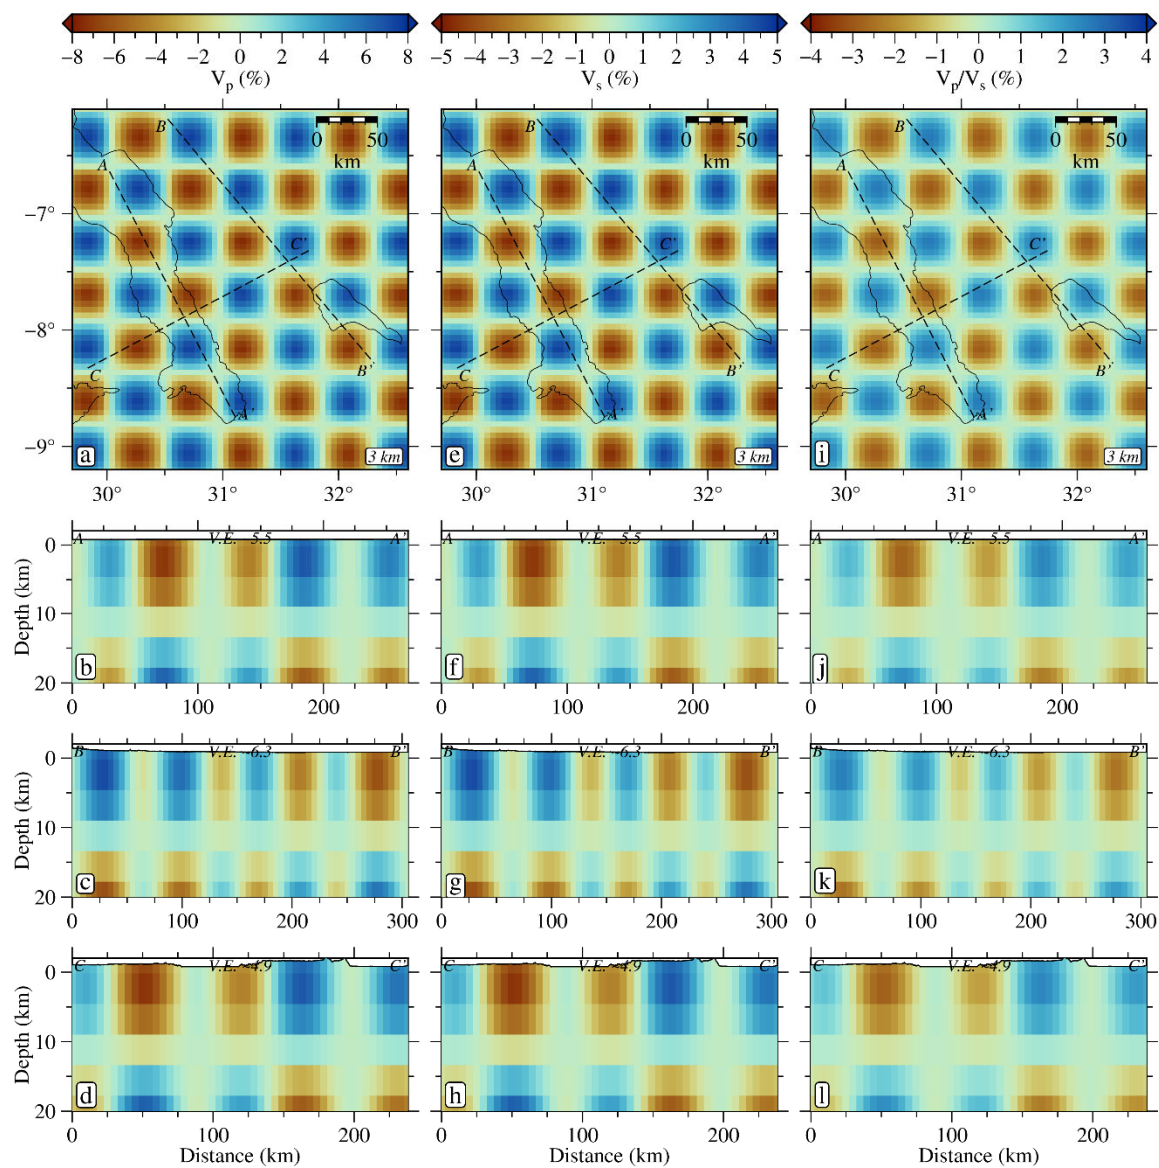

**Figure S12.** True synthetic model with 50 km x 50 km x 25 km checkers.

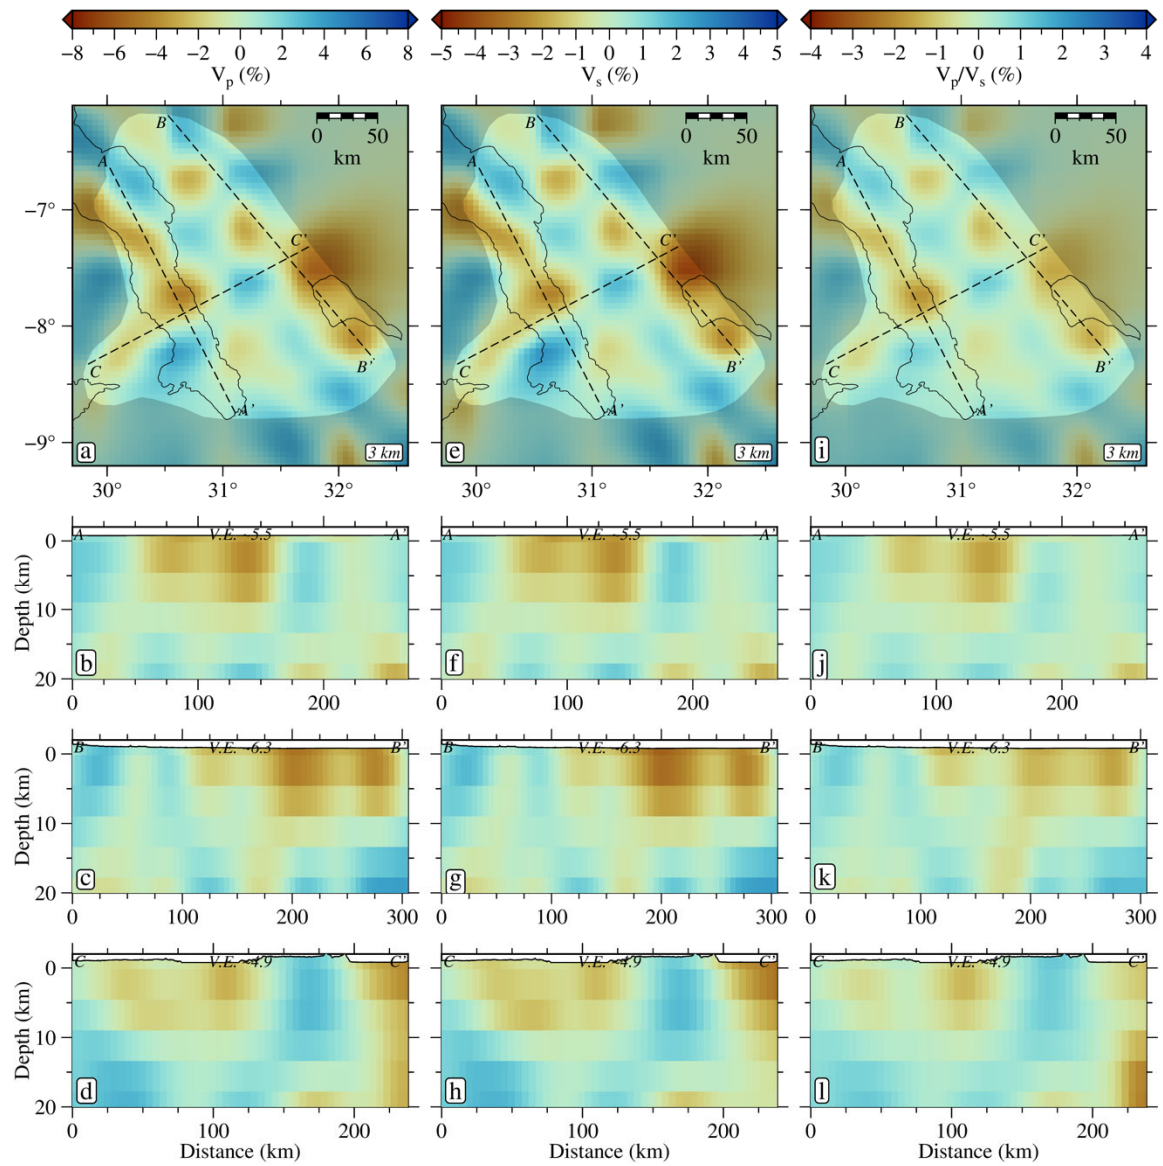

**Figure S13.** Recovered synthetic model with 50 km x 50 km x 25 km checkers. Unreliable areas of the models are lightly grayed out on the maps.



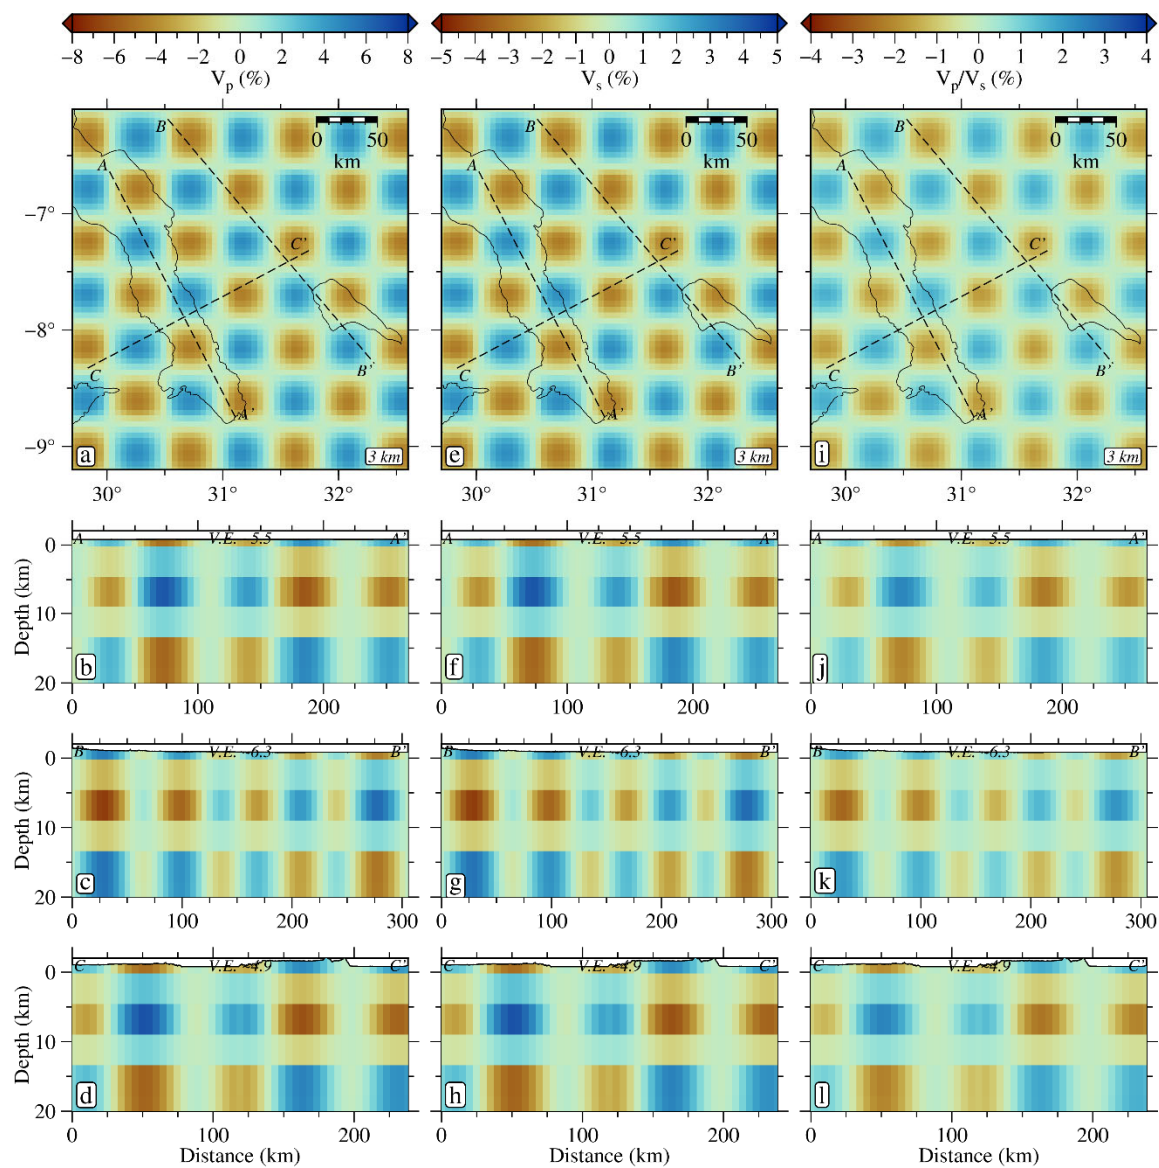

**Figure S14.** True synthetic model with 50 km x 50 km x 12.5 km checkers.



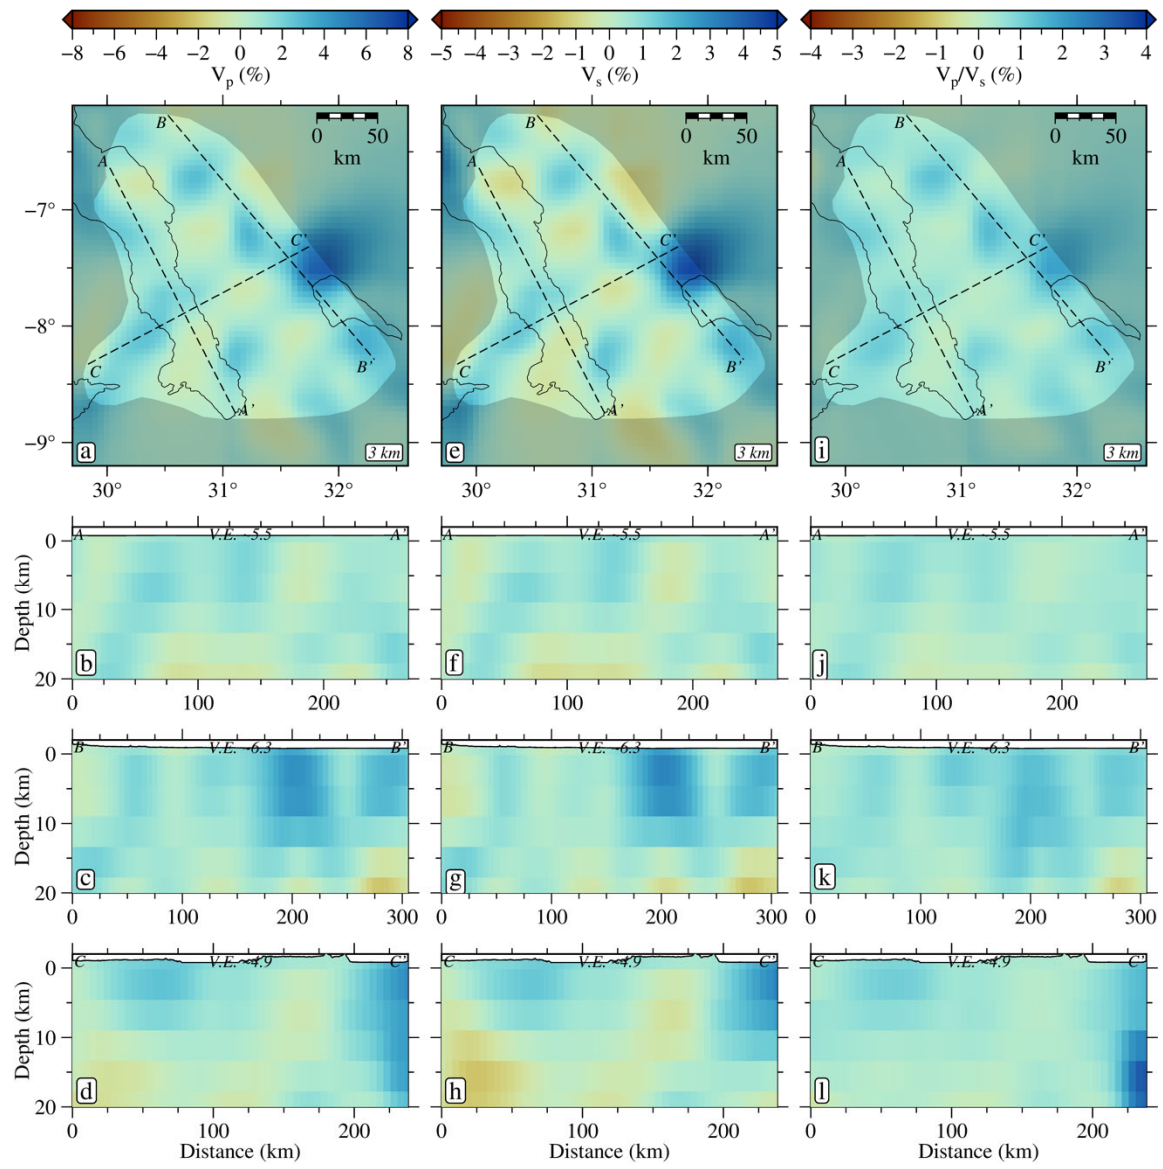

**Figure S15.** Recovered synthetic model with 50 km x 50 km x 12.5 km checkers. Unreliable areas of the models are lightly grayed out on the maps.

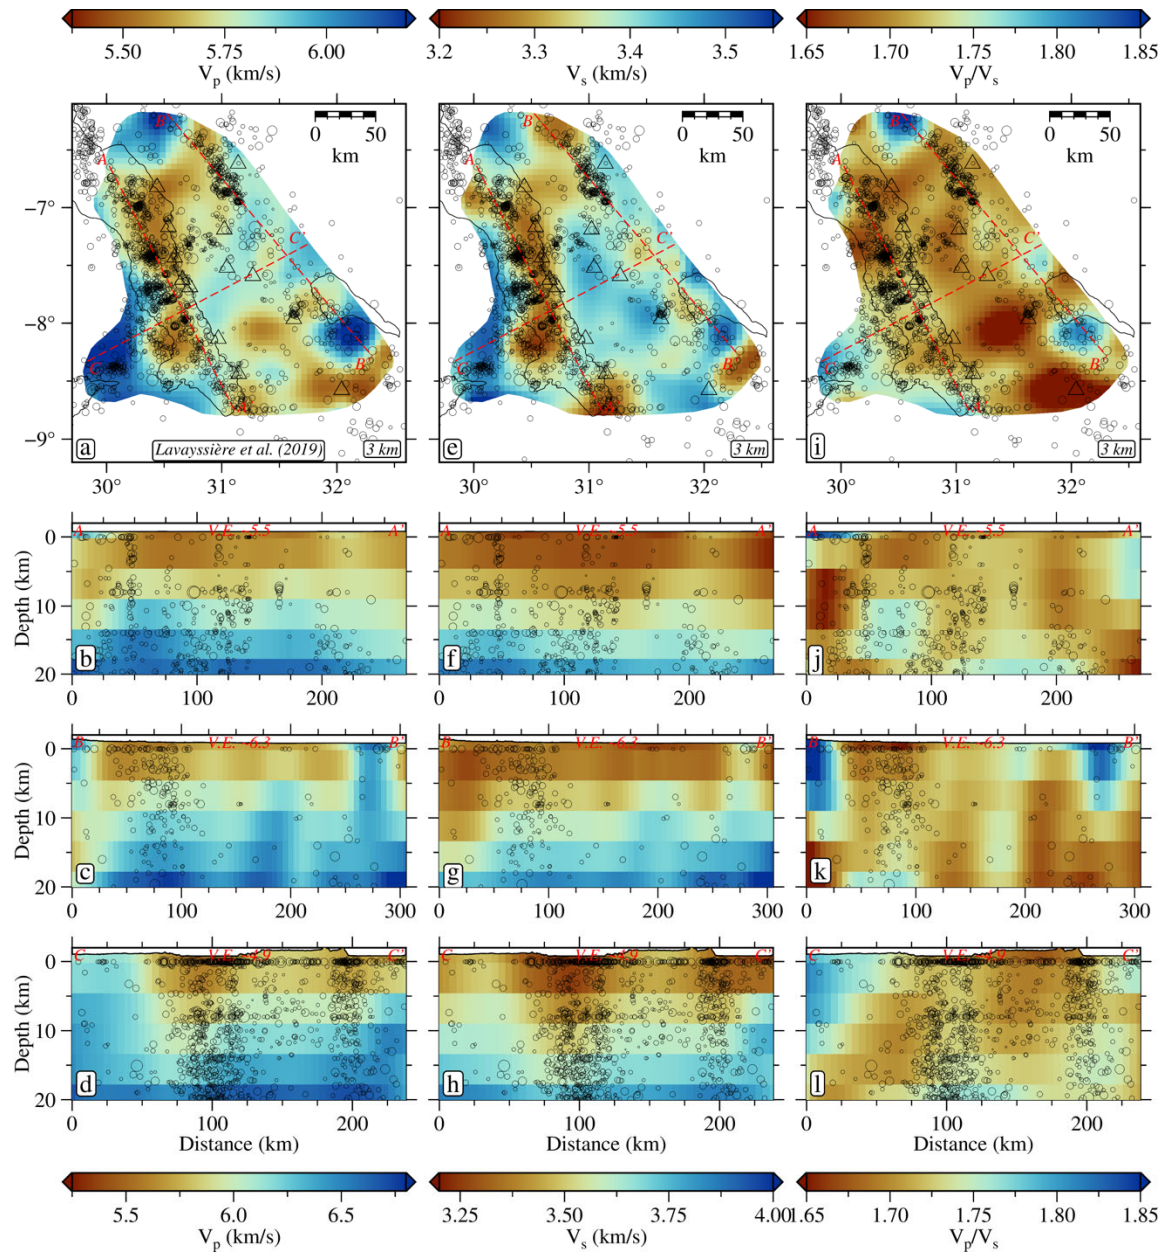

**Figure S16.** Same as Figure 3 in the manuscript but showing the absolute values of the model parameters rather than perturbations relative to the starting 1D models of Lavayssière et al. (2019).

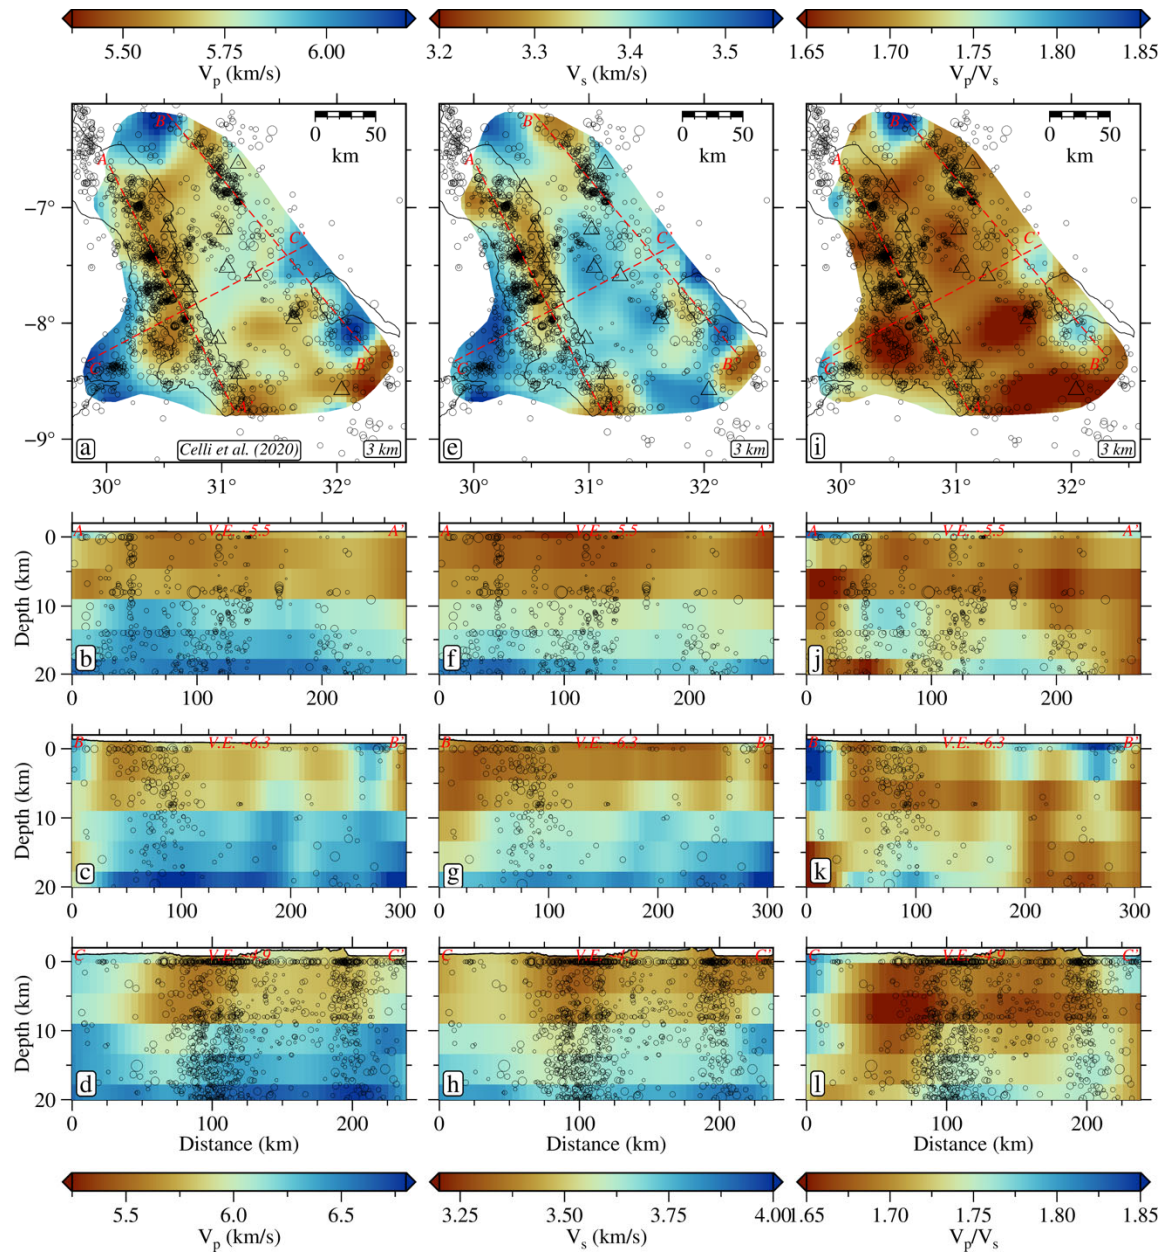

**Figure S17.** Inverted model results using the 3D regional P and S tomographic models of Celli et al. (2020) as starting models.



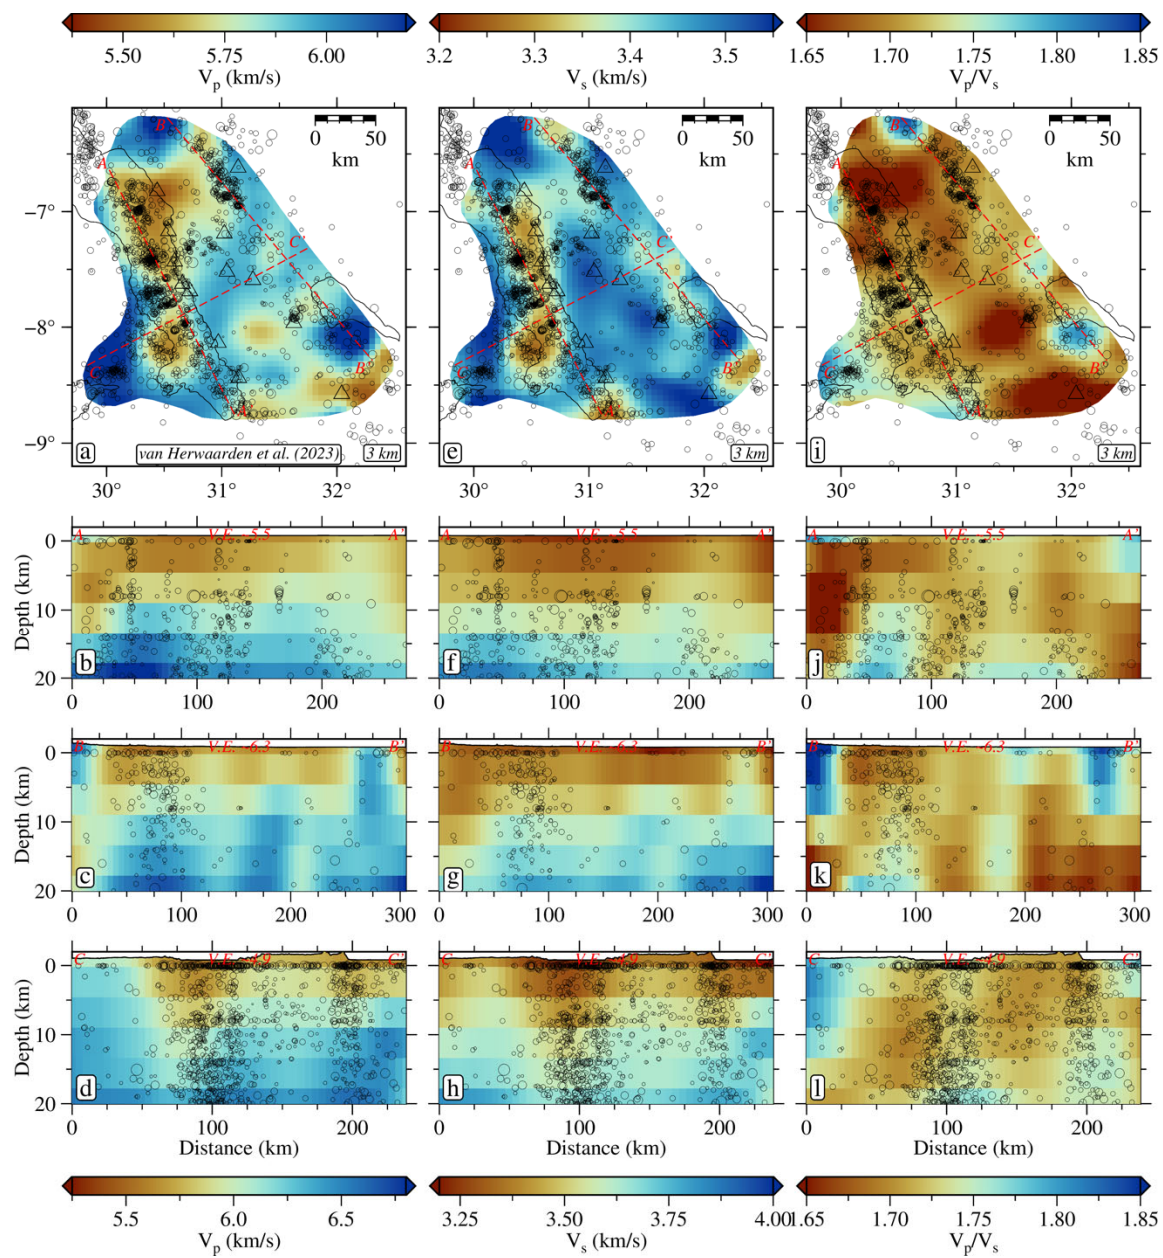

**Figure S18.** Inverted model results using the 3D regional P and S tomographic models of van Herwaarden et al. (2023) as starting models.

### References

- Celli, N. L., Lebedev, S., Schaeffer, A. J., & Gaina, C. (2020). African cratonic lithosphere carved by mantle plumes. *Nature Communications*, 11(92), 1-10.
- Lavayssière, A., Drooff, C., Ebinger, C. J., Gallacher, R., Illsley-Kemp, F., Oliva, S. J., & Keir, D. (2019). Depth Extent and Kinematics of Faulting in the Southern Tanganyika Rift, Africa. *Tectonics*, 38, 842-862.
- van Herwaarden, D., Thrastarson, S., Halpa, V., Afanasiev, M., Trampert, J., & Fichtner, A. (2023). Full-Waveform Tomography of the African Plate Using Dynamic Mini-Batches. *Journal of Geophysical Research: Solid Earth*, 126, 1-22.
